# Supplementary material for: Exploring the Trajectory of Catatonia in Neurodiverse and Neurotypical Pediatric Hospitalizations: A Multicenter Longitudinal Analysis
Source: PubMed Central journal article supplement — medRxiv. 2024 Jun 7:2024.06.06.24308554. Preprint. [Version 1] doi: 10.1101/2024.06.06.24308554 (PMC11178013; doi:10.1101/2024.06.06.24308554), 2024-06-07
Supplement: NIHPP2024.06.06.24308554v1-supplement-1.pdf [file NIHPP2024.06.06.24308554v1-supplement-1.pdf]

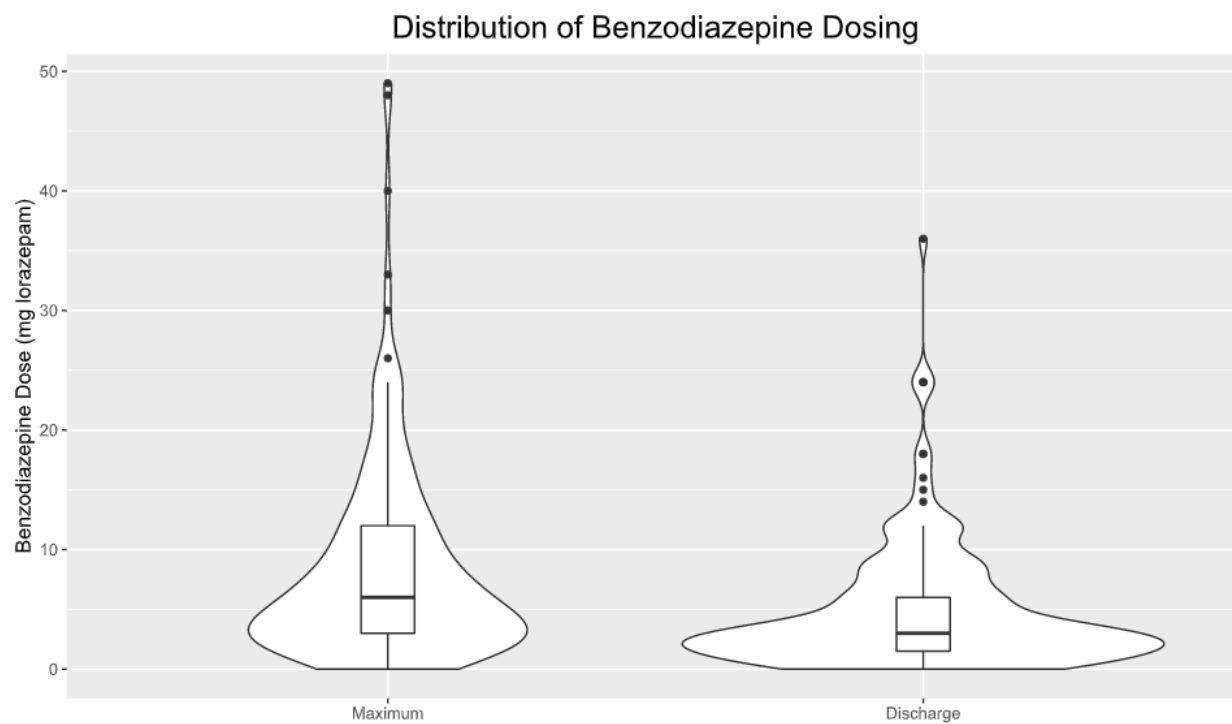

433

434 Figure S1: violin plots of the maximum benzodiazepine dose (left) and the discharge  
435 benzodiazepine dose (right) for pediatric patients with catatonia; the inset box in each plot  
436 displays median doses and IQR. Doses are listed in milligrams of lorazepam equivalents in a 24-  
437 hour period.

438

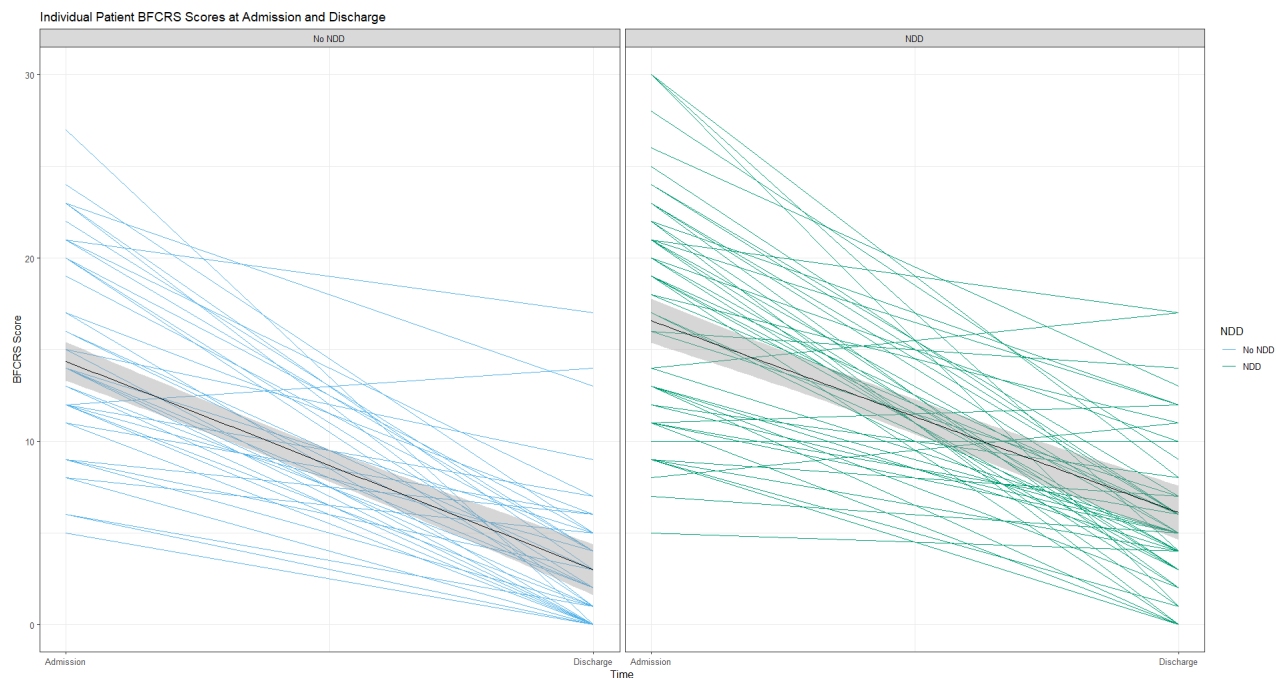

439  
440  
441  
442  
443  
444

Figure S2: plot of admission and discharge BFCRS scores for individuals (N=103) with a documented BFCRS at time of discharge, divided by patients with NDDs (blue) and without (green). The black lines indicate the mean.

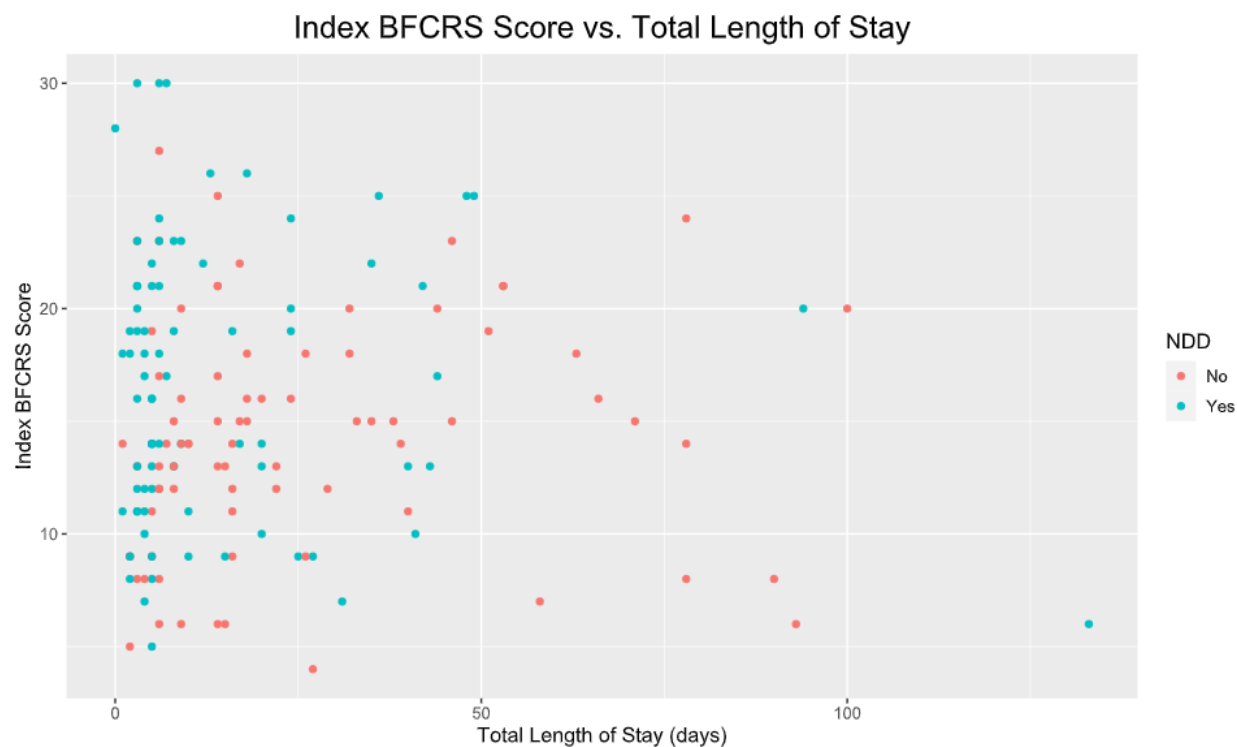

445  
446  
447 Figure S3: Scatterplot of initial BFCRS score vs. total length of stay (medical + psychiatric  
448 hospitalization) in days. Patients with an NDD are colored in blue, while those without an NDD  
449 are colored red.  
450  
451

| <b>Variable</b> | <b>OR</b> | <b>Lower<br/>0.95</b> | <b>Upper<br/>0.95</b> |
|-----------------|-----------|-----------------------|-----------------------|
| Age             | 1.11      | 0.87                  | 1.40                  |
| Index BFCRS     | 1.03      | 0.71                  | 1.48                  |
| Sex (Female)    | 1.39      | 0.88                  | 2.20                  |
| Site (2)        | 0.73      | 0.36                  | 1.51                  |
| NDD (yes)       | 0.59      | 0.36                  | 0.95                  |

452

453 Table S1: ordinal regression fit to CGI-I data adjusting for reviewer with subject-robust standard  
454 errors, with age, sex, study site, index BFCRS score, and NDD diagnosis (yes/no) as independent  
455 variables.
